# Supplementary material for: Differential role of MLKL in alcohol-associated and non–alcohol-associated fatty liver diseases in mice and humans
Source: JCI journal article supplement (doi:10.1172/jci.insight.140180), 2021-02-22
Supplement: sd1 [file 1]

You are being redirected.
